# Supplementary material for: Probing the properties of lattice vibrations and surface electronic states in magnetic semiconductor CrPS4
Source: Royal Society of Chemistry journal article supplement (doi:10.1039/c9ra05861c), 2019-01-01
Supplement: c9ra05861c1.pdf [file c9ra05861c1.pdf]

Electronic Supplementary Information

# Probing the properties of lattice vibration and surface electronic states in magnetic semiconductor CrPS<sub>4</sub>

Hongbiao Wu<sup>1</sup>, Haiping Chen<sup>1†</sup>

<sup>1</sup> School of Mechanics and Optoelectronic Physics, Anhui University of Science and Technology, Huainan 232001, P. R. China.

<sup>†</sup>To whom correspondence should be addressed. Email: hpchen01@mail.ustc.edu.cn

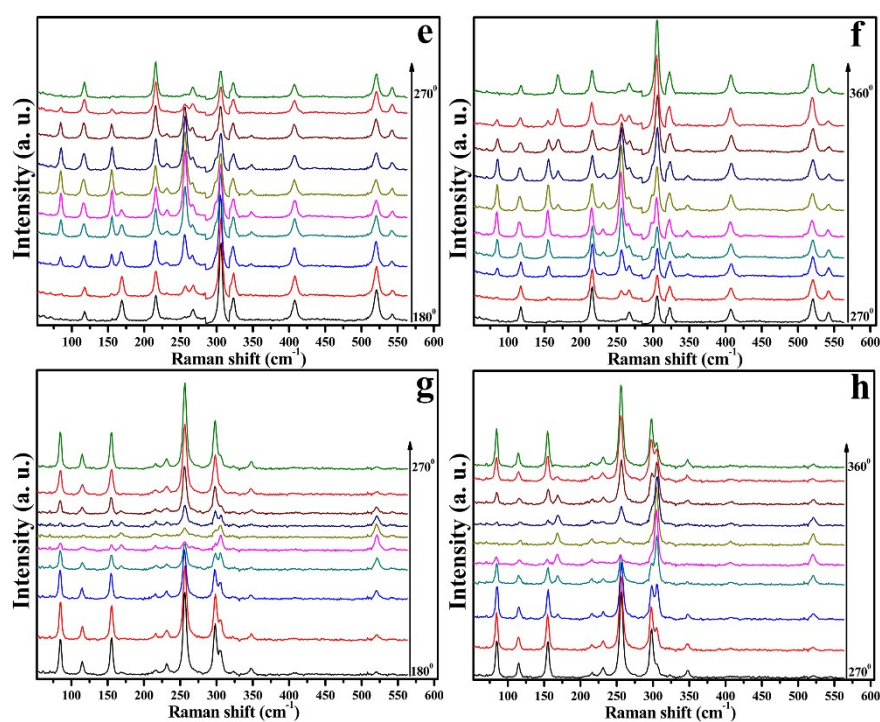

Fig. S1 The angle-dependent Raman peak intensity for (001) surface with the crystals rotated in 10° steps, (e) and (f) correspond to parallel polarization, (g) and (h) correspond to perpendicular polarization.

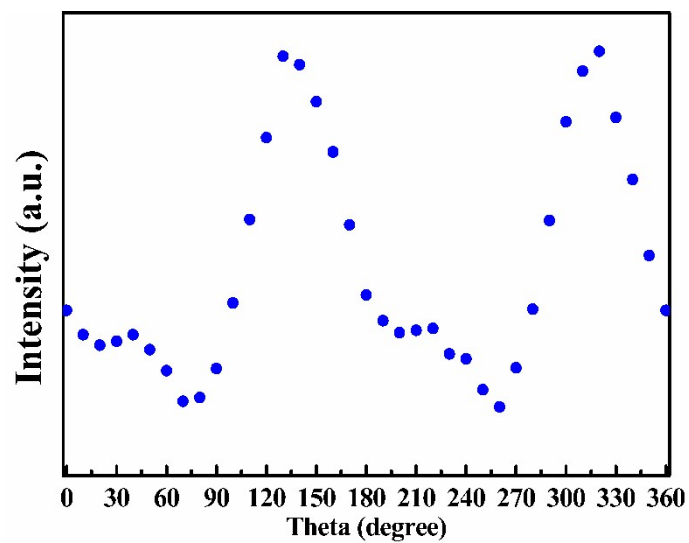

Fig. S2 The Raman shift located at  $305.4\text{cm}^{-1}$  for perpendicular polarization is fitted by Lorentz, the graph shows the relationship between rotating angle and normalized peak intensity.
